# Supplementary material for: Fiber-Reinforced Origami Electronics with High Rigidity and Flexibility for Display Applications
Source: Research Square preprint supplement (doi:10.21203/rs.3.rs-6877520/v1), 2025-06-27
Supplement: Supplementary file 1 [file 32420248beadb3962a912f0d.docx]

Supplementary Information

**Fiber-Reinforced Origami Electronics with High Rigidity and Flexibility for Display Applications**

*Dohyeon Gong1†, Minji Kang1†, Suhyeon Hwang1†, Jungwang Jo1, Insic Hong1, Yeonwook Roh1, 2*, Seungyong Han1*.*

1Multiscale Bioinspired Technology Lab, Department of Mechanical Engineering, Ajou University, 206 World Cup-ro, Yeongtong-gu, Suwon-si, Gyeonggi-do, 16499, Republic of Korea

2Bioinspired Robotics and Design Lab, University of California San Diego, 9500 Gilman Dr, La Jolla, CA 92093, United States

†D. Gong, M. Kang, and S. Hwang contributed equally to this work.

*Correspondence to

Yeonwook Roh: yeroh@ucsd.edu

Seungyong Han: sy84han@ajou.ac.kr

***Contents***

***Page***

Supplementary Methods (procedure for fabricating the origami electronics)3

Supplementary Notes4

Note S1. Capacitive touch panel based on PEDOT:PSS3

Note S2. Characteristics of the origami electronics integrated with LED displays6

Note S3. Flasher origami pattern with a high compression ratio7

Note S4. 3D bistable structure based on the Kresling pattern7

**Supplementary Figures 9**

Fig. S1. Fabrication process of the origami electronics 9

Fig. S2. Bending stiffness of the rigid link according to the thickness of PET10

Fig. S3. Photographs of the repetitive folding setup for the Miura-patterned origami electronics11

Fig. S4. Folding cycle test of Waterbomb-patterned origami electronics 12

Fig. S5. Fiber volume fraction (, %) according to the spacing between nylon fibers 13

Fig. S6. FEA simulation of the tensile stress distribution in the flexure hinge 14

Fig. S7. Tensile impact test of the origami electronics under high-speed pulling15

Fig. S8. Photograph of the Miura-patterned origami electronics under size compression 16

Fig. S9. Evaluation of the 1D touch panel performance according to the spin-coating speed in the PEDOT:PSS fabrication process 17

Fig. S10. Construction of a Miura-patterned 2D touch panel for continuous drawing 18

Fig. S11. Normalized current changes of Miura-patterned origami electronics during folding 19

Fig. S12. LED response according to the PEDOT:PSS line width 20

Fig. S13. Schematic of the rotational folding process of the Flasher origami pattern 21

Fig. S14. Design parameters and characteristics of the Kresling pattern 22

Fig. S15. Tuning of the Kresling-patterned origami electronics from state 2 to state 123

**Supplementary Movies24**

**Supplementary methods**

**Procedure for fabricating the origami electronics**

1. Fabrication of the fiber-reinforced electronic composite
   1. Fit a nylon fiber into the uniformly spaced grooves of an acrylic plate (85 90 mm).
   2. Treat the nylon-fitted acrylic plate with oxygen plasma (100 W, 30 s).
   3. Spin-coat a polydimethylsiloxane (PDMS) (SylgardTM 184; K1 Solution, Gwangmyeong, Republic of Korea) solution onto the nylon-fitted acrylic plate.
   4. Cure the coated PDMS solution in an oven at 80 °C for 3 hours.
   5. Spin-coat a poly(3,4-ethylenedioxythiophene):poly(styrenesulfonate) (PEDOT:PSS) (655201; Sigma‒Aldrich, St. Louis, MO, USA) solution onto the fiber-reinforced composite.
   6. Cure PEDOT:PSS in an oven at 70 °C for 3 hours.
   7. Treat the fiber-reinforced electronic composite with oxygen plasma (100 W, 30 s).
   8. Place a patterned mask for sensing electrical signals via wires onto the composite.
   9. Deposit 2 nm of Cr and 90 nm of gold via sputtering.
   10. Remove the mask, and spin-coat polyurethan resin to protect the electrode layer.
   11. Cure the polyurethan resin in an oven at 90 °C for 12 hours.
2. Fabrication of the origami electronics by integrating rigid links
   1. Attach a 50 µm optically clear adhesive (OCA) to a 200 µm polyethylene terephthalate (PET) film.
   2. Cut the laminated film along the designed origami pattern using a laser.
   3. Bond the OCA surface of rigid links to the fiber-reinforced electronic composite.

**Supplementary Notes**

*Note S1. Capacitive touch panel based on PEDOT:PSS*

To demonstrate the capability of the fiber-reinforced electronic composite for touch panel applications, we constructed a surface-capacitive touch panel based on PEDOT:PSS. This touch panel utilizes a simple sensing mechanism based on changes in surface capacitance upon contact. The functionalities of the touch panel depend on the thickness of PEDOT:PSS. In the PEDOT:PSS fabrication process, control of the spin-coating speed allows adjustment of its thickness, thereby enhancing the functionality of the electronics.

The electrical conductivity is a critical parameter for increasing the performance of touch panels by effectively transmitting localized capacitive changes to the control board without signal loss or response delays[1](#_ENREF_1). To evaluate the electrical conductivity of the touch panel according to the spin-coating speed, the sheet resistance was measured in each of 9 distinct regions using a surface resistance meter (MCP-T360, Mitsubishi), and the values were averaged (Fig. S9A). The average sheet resistance was converted into the relative electrical conductivity, which is inversely proportional to the sheet resistance (, where is the average sheet resistance), thereby serving as a parameter for comparing the conductivities obtained at different spin-coating speeds. Figure S9B shows that lower spin-coating speeds result in increased electrical conductivity due to the thicker PEDOT:PSS. However, the thickened electrode layer can reduce the touch sensitivity[2](#_ENREF_2). To analyze the touch sensitivity changes according to the thickness variation of PEDOT:PSS, we fabricated one-dimensional (1D) edge-electrode touch panels (70 mm × 20 mm). The 1D touch panel measures the current changes induced by finger touch through an AC voltage (100 Hz, 2 ) connected to the edge electrodes (Fig. S9C). The current changes are described by the following equation:

where ​ is the baseline current arising from the parasitic capacitance and is the additional current induced by finger touch, which indicates the touch sensitivity[3](#_ENREF_3). According to equation S1, the touch sensitivity is expressed using the following equation:

As shown in Fig. S9D, the touch sensitivity calculated using equation S2 increases with increasing spin-coating speed because the increased electrical resistance in the thin electrode suppresses diffusion of the touch signal, resulting in a more distinct local capacitance change[4](#_ENREF_4). Although an enhanced touch sensitivity can improve the performance of the touch panel, excessive sensitivity should be avoided. Overly sensitive panels may respond to external noise or unintended touches, potentially leading to malfunctions[5](#_ENREF_5). Considering both these potential risks and the experimental results, we set the spin-coating speed to 500 rpm.

An advanced touch panel for visualizing two-dimensional (2D) drawings through simple touch was designed with high-frequency AC voltage sources connected to four corner electrodes (A1, A2, A3, A4), ensuring a uniform electric field distribution across the entire panel surface. The 2D touch panel is capable of displaying the relative coordinates (α, β) by measuring the current changes at the four corners upon touch (Fig. S10A). The touch point can be calculated in real time by analyzing these current changes[3](#_ENREF_3),[6](#_ENREF_6). To create a uniform electric field in the touch panel, a function generator (AFG-2005, GW Instek Co., New Taipei, Taiwan) and a current meter (Keithley DMM7510, Tektronix Co., Solon, Ohio, USA) are used to apply the AC voltages to each corner of the panel. A control board (EXII-7760UC, 3M Co., St. Paul, Minnesota, USA) measures the current changes in the panel and displays the precise touch position on a monitor (Fig. S10B). The control board calculates the relative coordinates using the following equations:

|  | , | (S3) |
| --- | --- | --- |

where the current outputs at each corner are , , , and . Using these values, the precise touch position can be displayed on the monitor.

To detect touch points on the Miura-integrated touch panel, we applied an AC signal with a root mean square (RMS) voltage of 2 V at 100 kHz (Fig. S10C). The magnitude of the current measured at each corner electrode inversely varies with the distance from the touch point (TP). For example, when the touch point is TP#1, which is close to corner A1, the current at A1 shows the largest change (Fig. 4B). Similarly, the touch points TP#2, TP#3, and TP#4 close to corners A2, A3, and A4 result in the greatest current changes at the respective corners (Fig. S10D). These results confirm that the fiber-reinforced electronic composite based on PEDOT:PSS can serve as a touch panel capable of accurately detecting the touch point. Although continuous touches, such as drawing of some letters, may lead to slight inaccuracies, the use of a tool for calibration and linearization (MT 7 Software Control Panel, Version 7.14.9) can increase the detection accuracy. This tool processes the continuous coordinate data of touch points to ensure accurate rendering of the traced path, such as the square trajectory shown in Fig. 4E and F.

*Note S2. Characteristics of the origami electronics integrated with LED displays*

An LED display integrated with the origami pattern was implemented by designing conductive circuits of the PEDOT:PSS electrode within the fiber-reinforced electronic composite. To ensure stable LED activation of the display, we investigated the conductivity of PEDOT:PSS circuits with various line widths. When the line width of the PEDOT:PSS circuits with a thickness of 400 nm was set to 1 mm, 2 mm, and 3 mm, the operating currents for LED activation were measured as 4 mA, 7 mA, and 8 mA, respectively (Fig. S12A). Nevertheless, the LED brightness remained comparable across all three widths (Fig. S12B) because sufficiently thick PEDOT:PSS forms multiple conductive pathways through phase separation between the PEDOT-rich conductive domains and PSS-rich insulating domains[7](#_ENREF_7). These expanded conductive pathways enable stable and efficient charge transport, thereby minimizing the reduction in electrical conductivity caused by differences in line width.

*Note S3. Flasher origami pattern with a high compression ratio*

One of the key functions of origami is compact compression into a flat 2D sheet, thereby enhancing portability and expandability. In this work, we introduce a highly compressible origami pattern, that is, the Flasher origami pattern, for compact portable displays. The Flasher pattern shows rotationally symmetric folding around a central core facet, which enables multidirectional folding and enhancement of the compression ratio. Originally developed for solar sail designs requiring compression ratios on the order of hundreds, the Flasher pattern features a radial crease structure[8](#_ENREF_8). In our design, a square sheet was uniformly divided into 5 segments, each capable of rotational folding toward the central segment (Fig. S13). The Flasher pattern-based fiber-reinforced electronic composite enables a portable LED display that can be compressed to 25 times smaller than its deployed size (Fig. 5A).

*Note S4. 3D bistable structure based on the Kresling pattern*

The Kresling pattern can be transformed into three-dimensional cylindrical structures with tunable mechanical stiffness, which can range from easily foldable to robust depending on its pattern design[9](#_ENREF_9),[10](#_ENREF_10). This pattern consists of an array of triangular unit facets, which enable configuration of a 3D cylindrical structure with specific mechanical properties according to their angle. For example, when the side length is 11.5 mm and the angle of the triangular facet is 25°, the structure forms a 3D shape with weak mechanical stiffness, making it easily foldable for compact storage (Fig. S14A). In contrast, increasing the folding angle to 65° results in a rigid 3D cylindrical structure with enhanced stiffness that is capable of withstanding a load of 500 g (Fig. S14B).

A strategy that integrates these two types of Kresling patterns was designed to enable tunable mechanical stiffness between foldability and robustness[11](#_ENREF_11). In this work, we developed a wearable touch panel that can be configured into a 3D ring shape for wearing on the finger and can be compactly folded for portability by applying the newly designed Kresling pattern (Fig. 5D). The tunable properties (foldability and robustness) of the touch ring are realized through a bistable system that transitions by switching the folded lines between the valley fold (angle of 25°) and mountain fold 2 (angle of 65°), as shown in Fig. S15. For example, when the Kresling pattern is configured into a cylindrical ring structure, the mountain fold 2 line is slightly folded outward, forming a robust equilibrium state (state 2). In this state, the touch panel maintains its robustness because mountain fold 2 is mutually supported by adjacent folds. Here, application of a force to the valley fold alters the folded line, resulting in a transition to the easily foldable equilibrium state (state 1). In state 1, the touch ring offers the advantage of compact storage.

**Supplementary Figures**


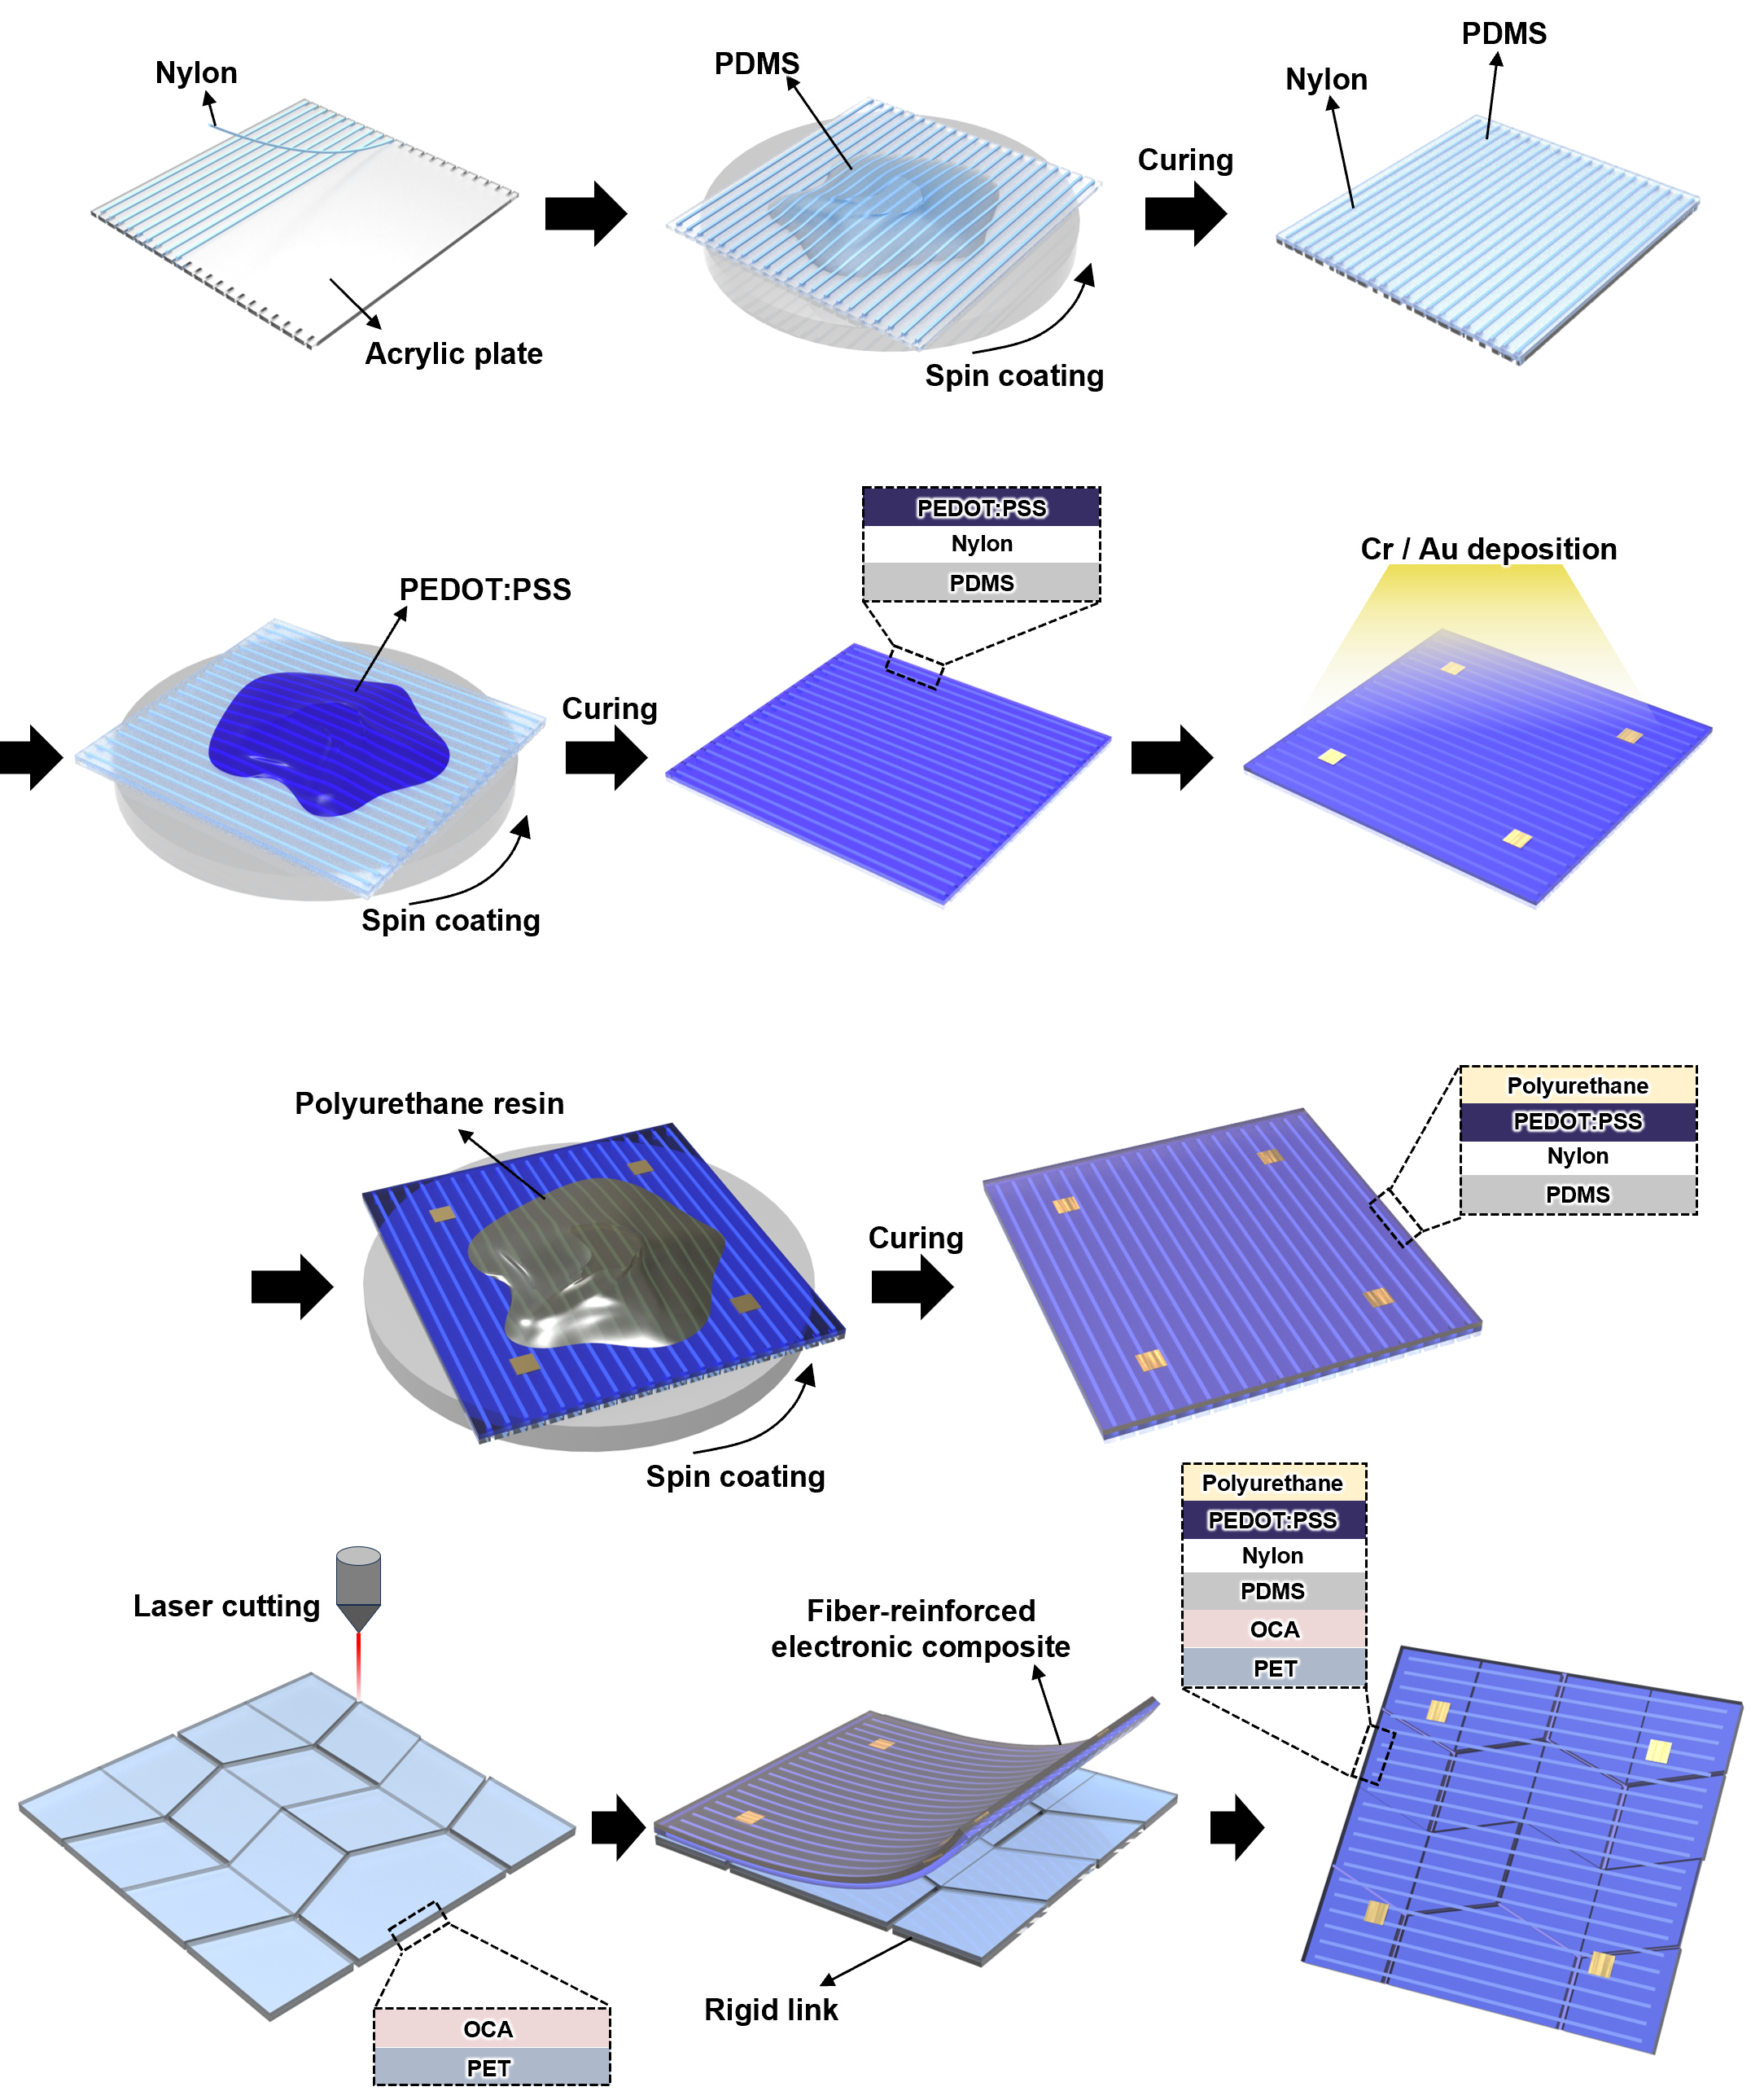


**Fig. S1. Fabrication process of the origami electronics.**


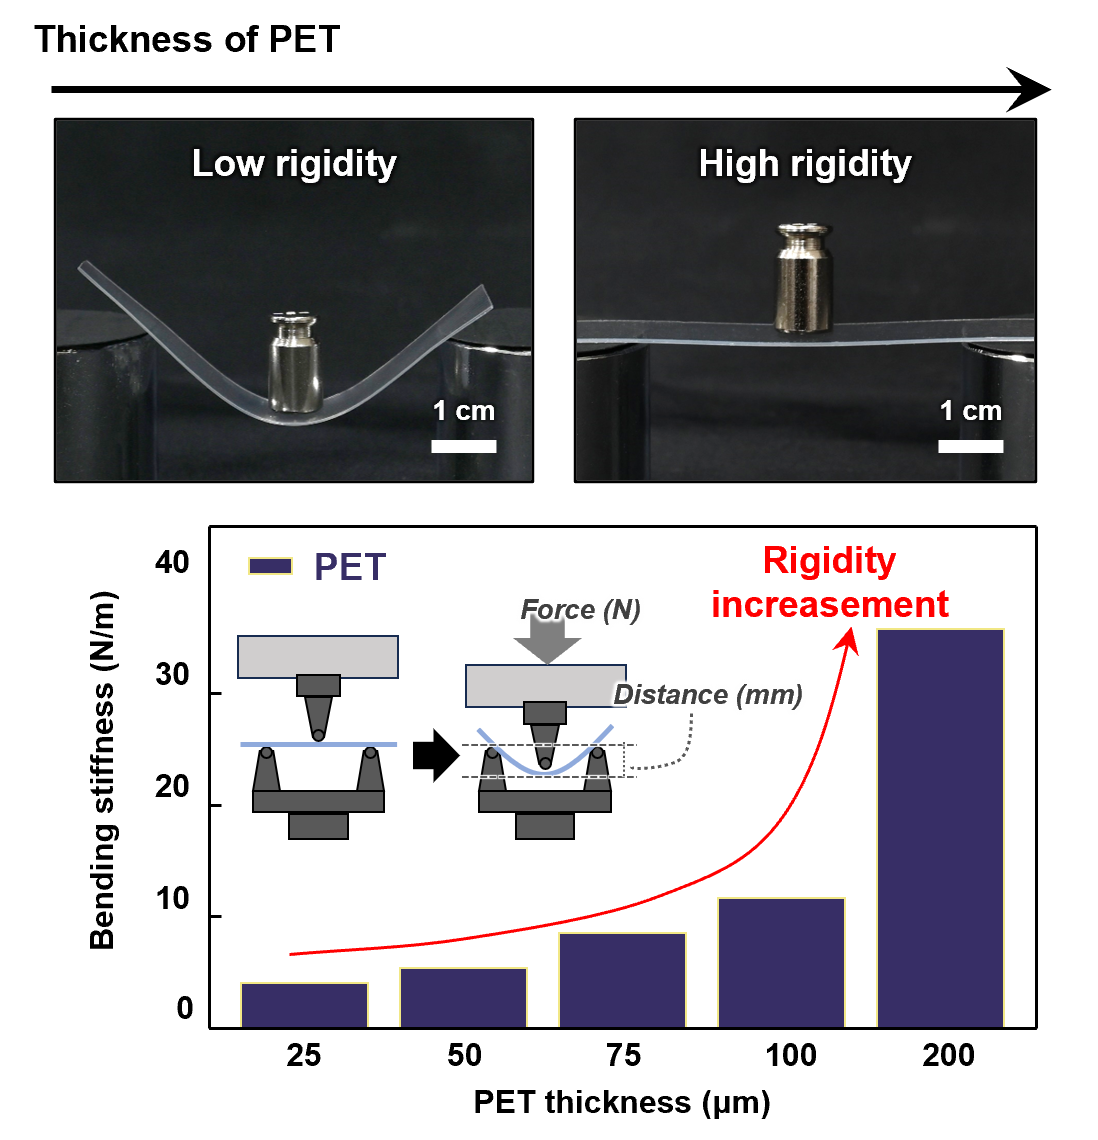


**Fig. S2.** **Bending stiffness of the rigid link according to the thickness of PET.**


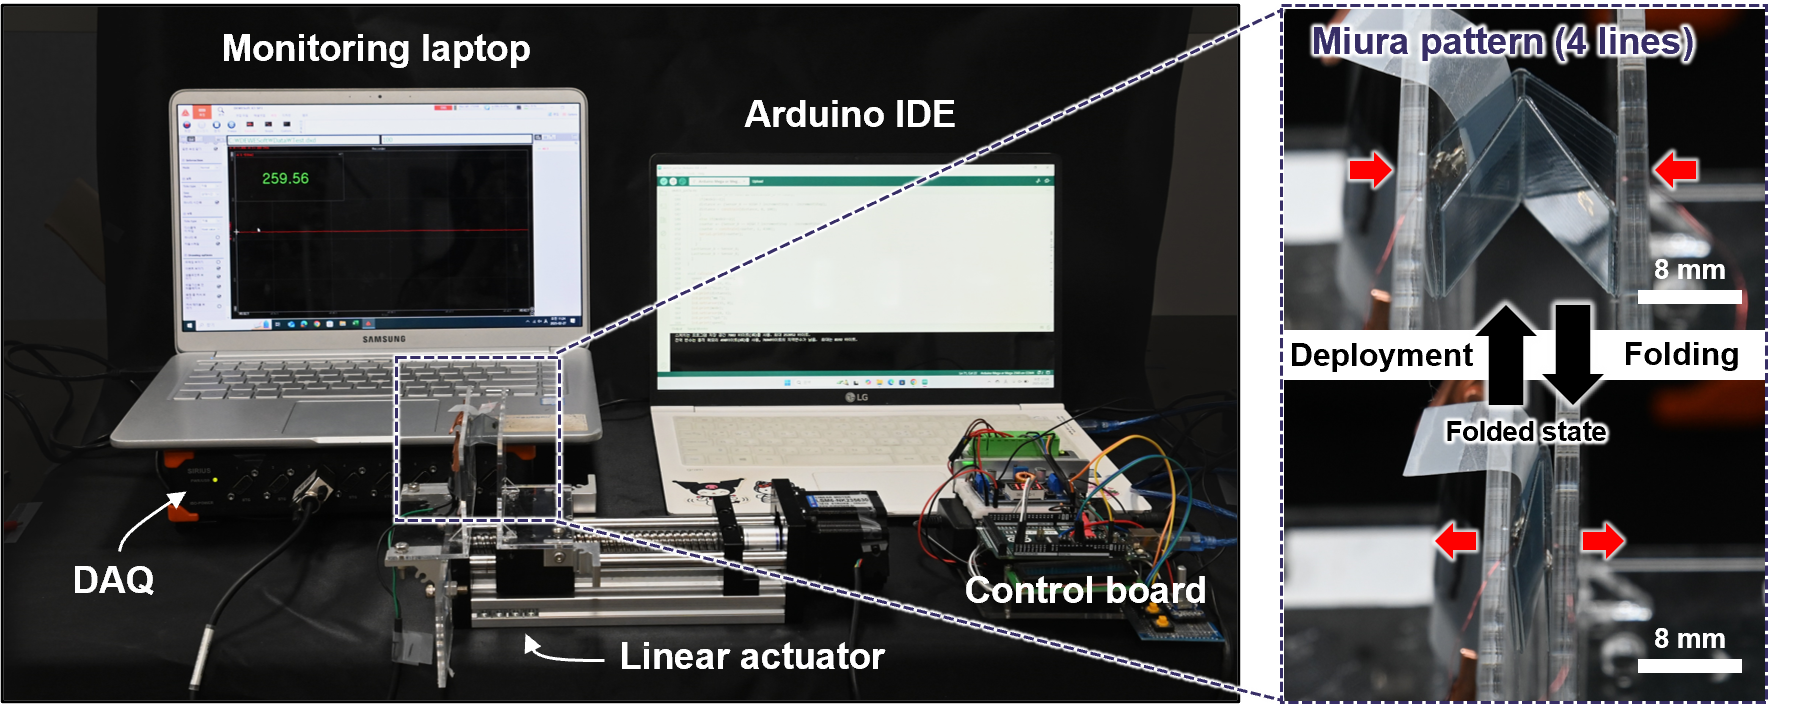


**Fig. S3.** **Photographs of the repetitive folding setup for the Miura-patterned origami electronics.**


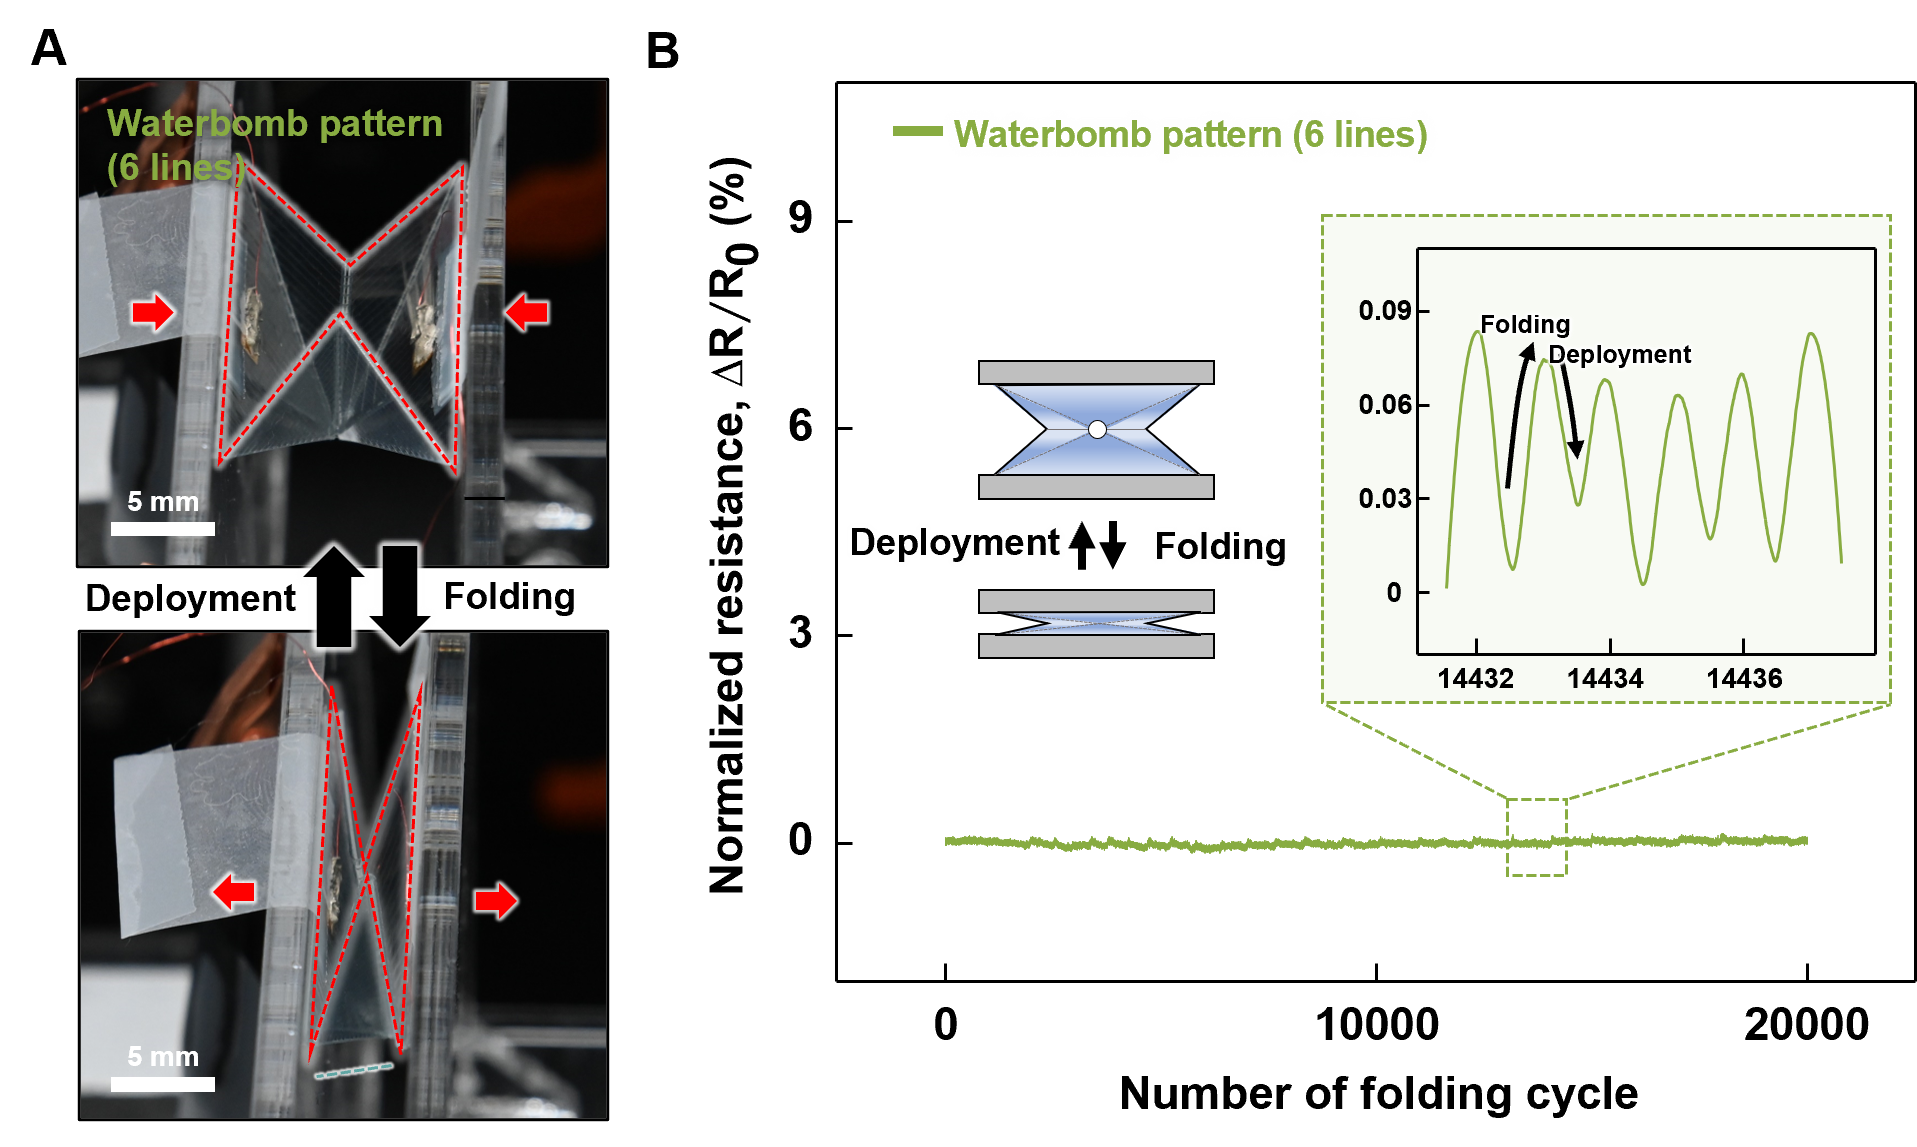


**Fig. S4. Folding cycle test of Waterbomb-patterned origami electronics. (A)** Photographs of the folding test of Waterbomb-patterned origami electronics. **(B)** Graph of the normalized resistance during 20,000 folding cycles of Waterbomb-patterned origami electronics.


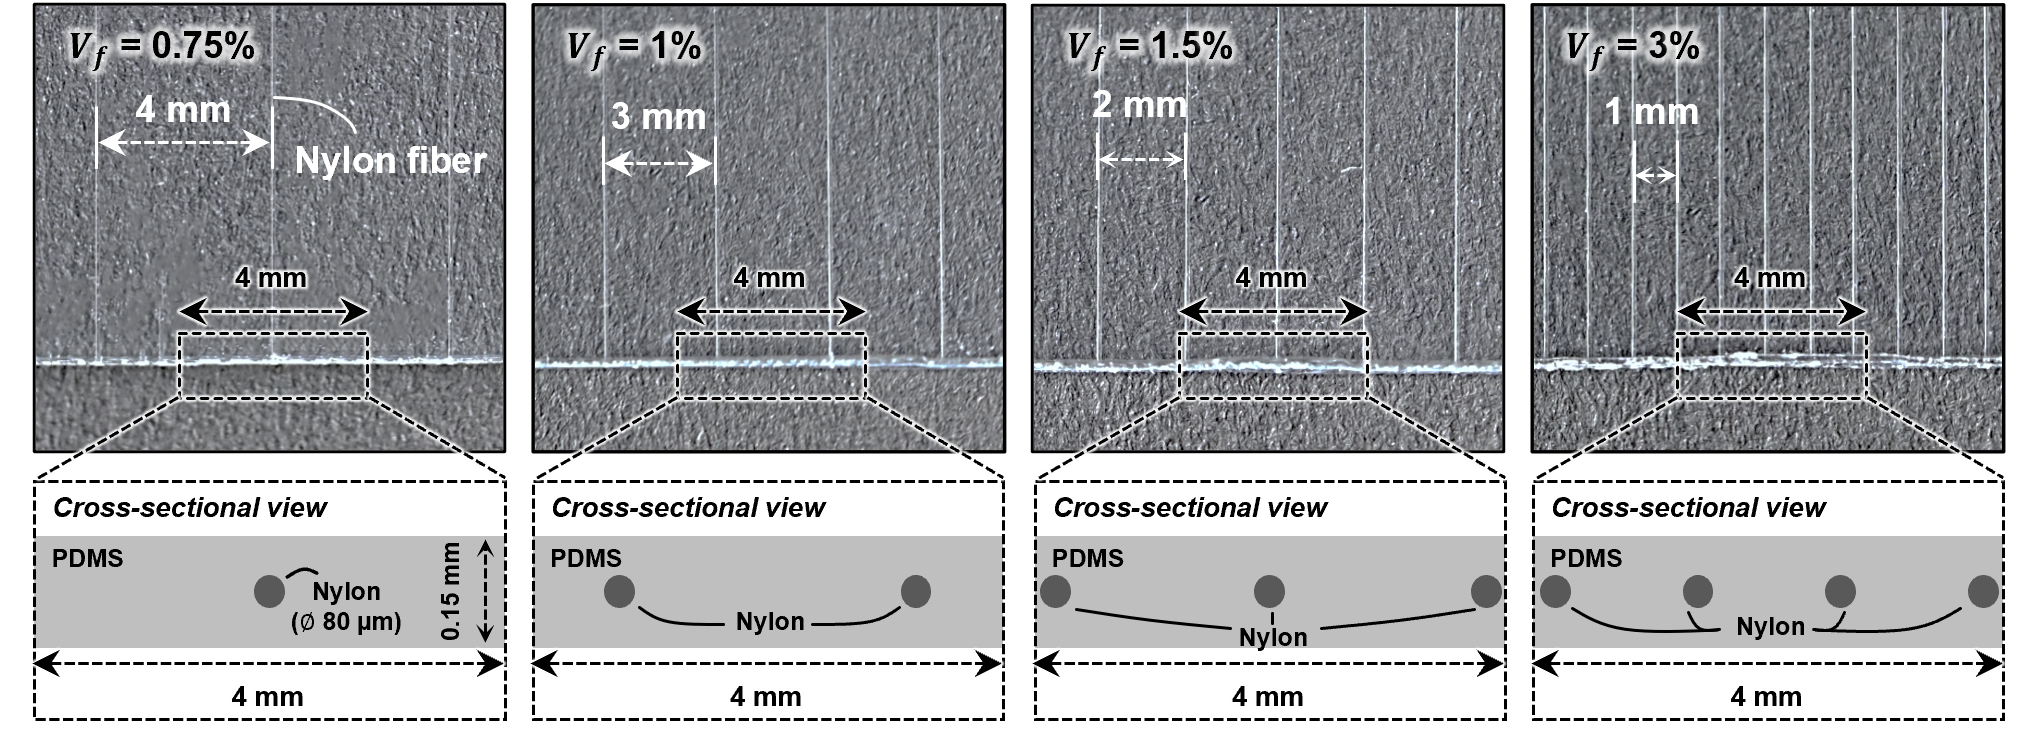


**Fig. S5.** **Fiber volume fraction (****, %) according to the spacing between nylon fibers.**


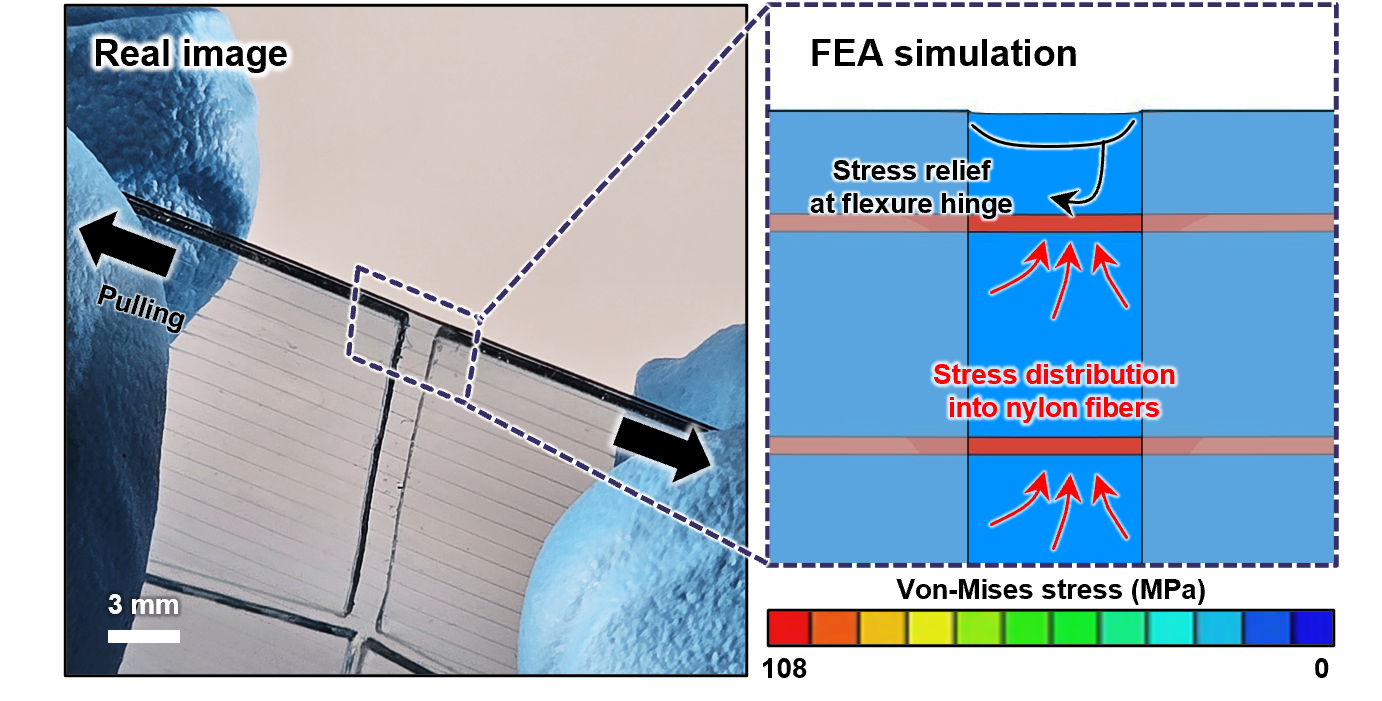


**Fig. S6.** **FEA simulation of the tensile stress distribution in the flexure hinge.**

**
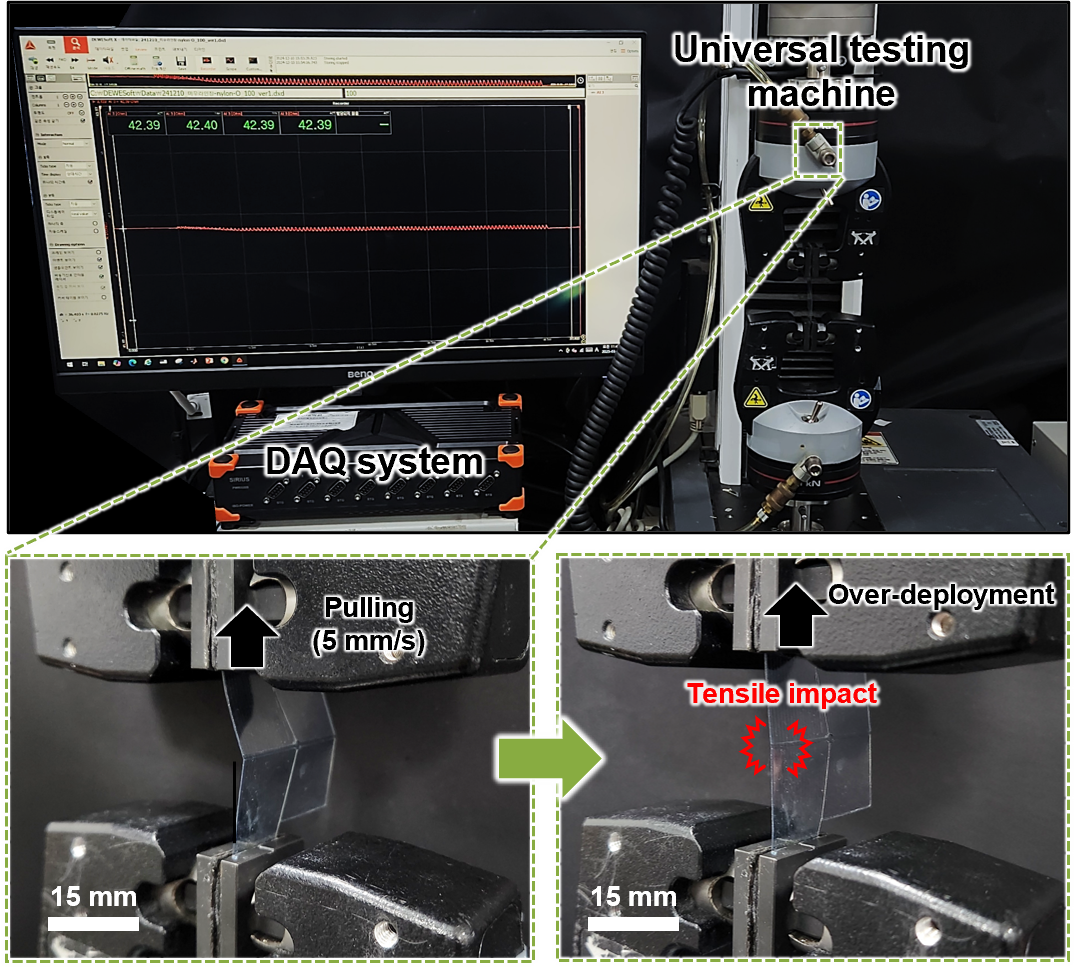
**

**Fig. S7.** **Tensile impact test of the origami electronics under high-speed pulling.** (Pulling speed = 5 mm/s)


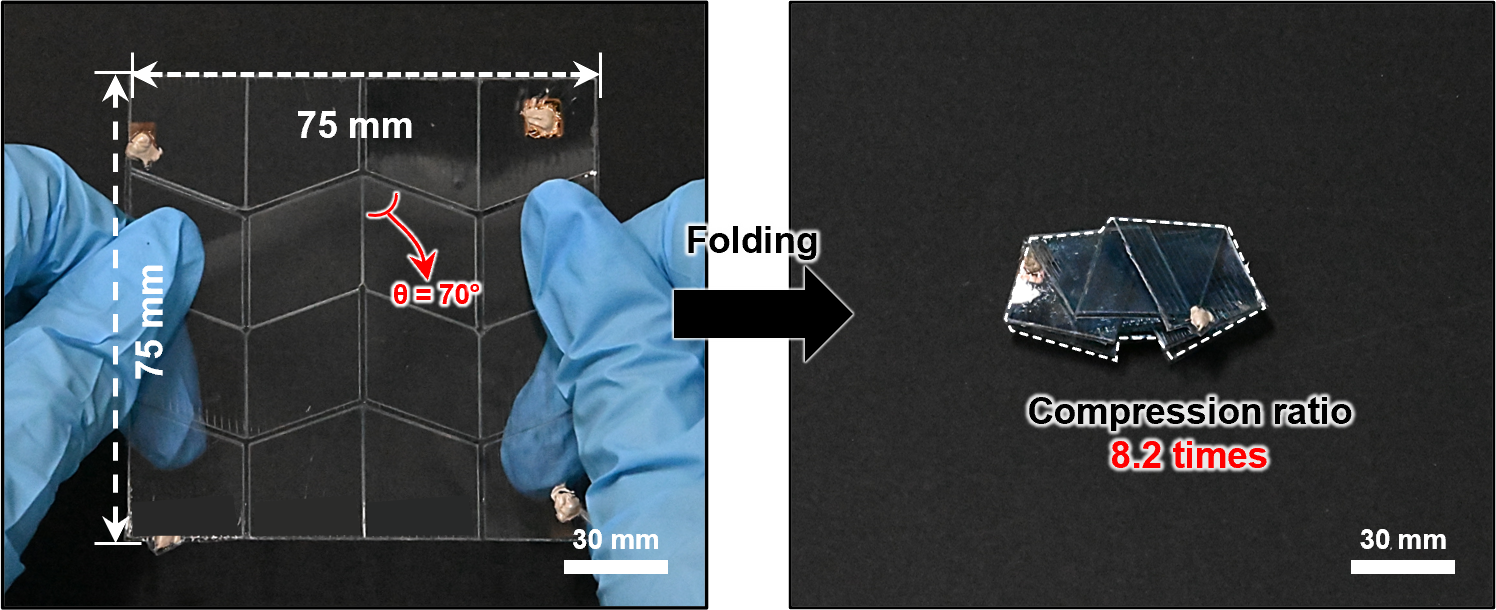


**Fig. S8. Photograph of the Miura-patterned origami electronics under size compression.** (Folding angle = 70°, compression ratio of 8.2 times)


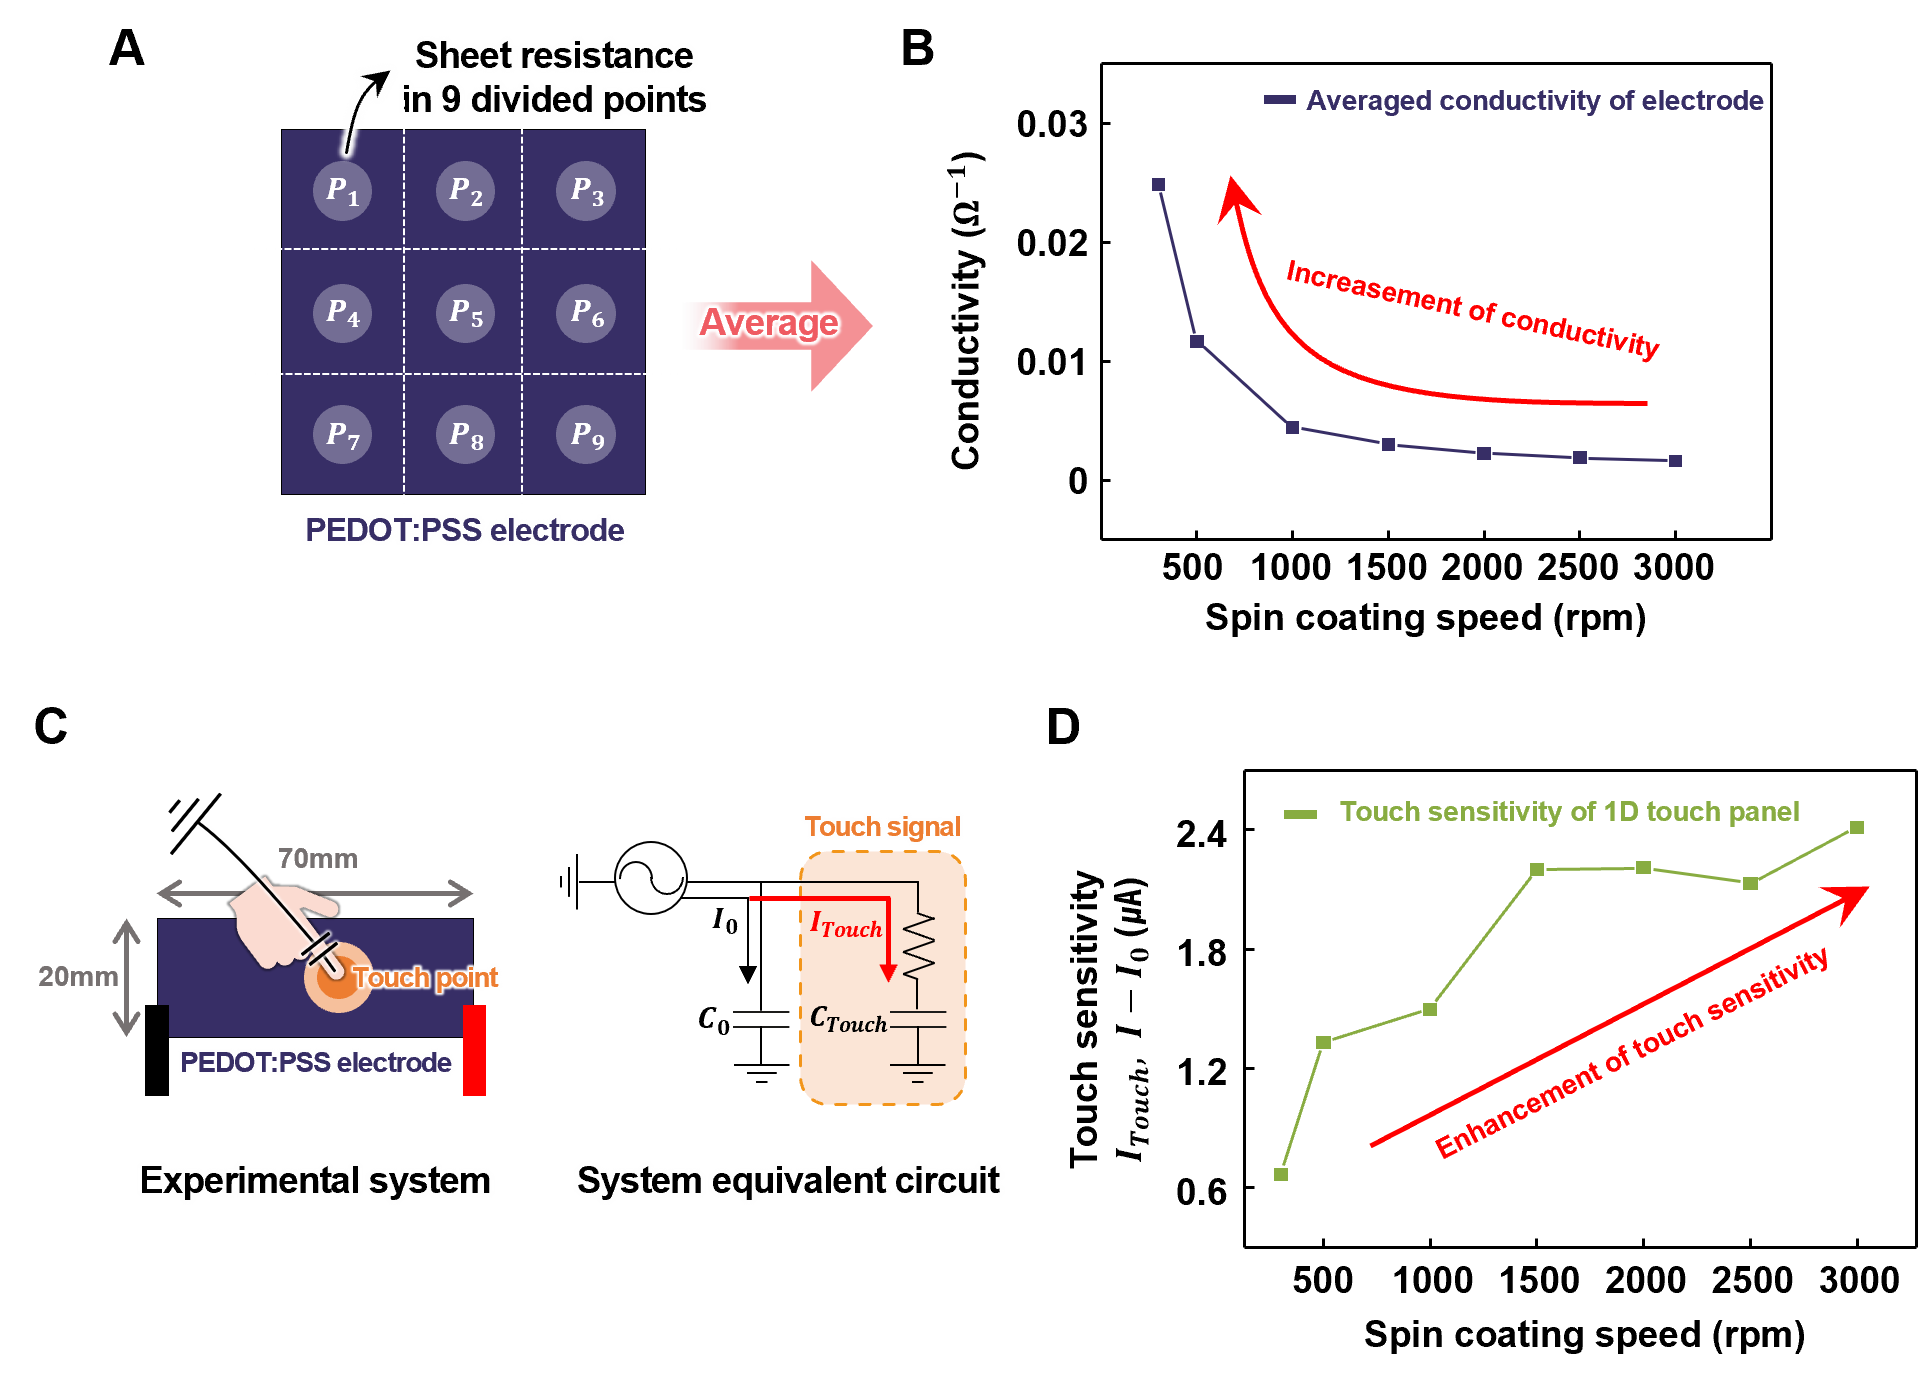


**Fig.** **S9. Evaluation of the 1D touch panel performance according to the spin-coating speed in the PEDOT:PSS fabrication process. (A)** Schematic of the sheet resistance measurement for PEDOT:PSS. **(B)** Conductivity of the PEDOT:PSS electrode as a function of the spin coating speed (average of 9 measurement points). **(C)** Touch sensitivity test according to the spin-coating speed of the PEDOT:PSS electrode, and equivalent circuit of the touch-induced current change (orange box: generated after touch). **(D)** Touch sensitivity () of the PEDOT:PSS electrode as a function of the spin-coating speed.


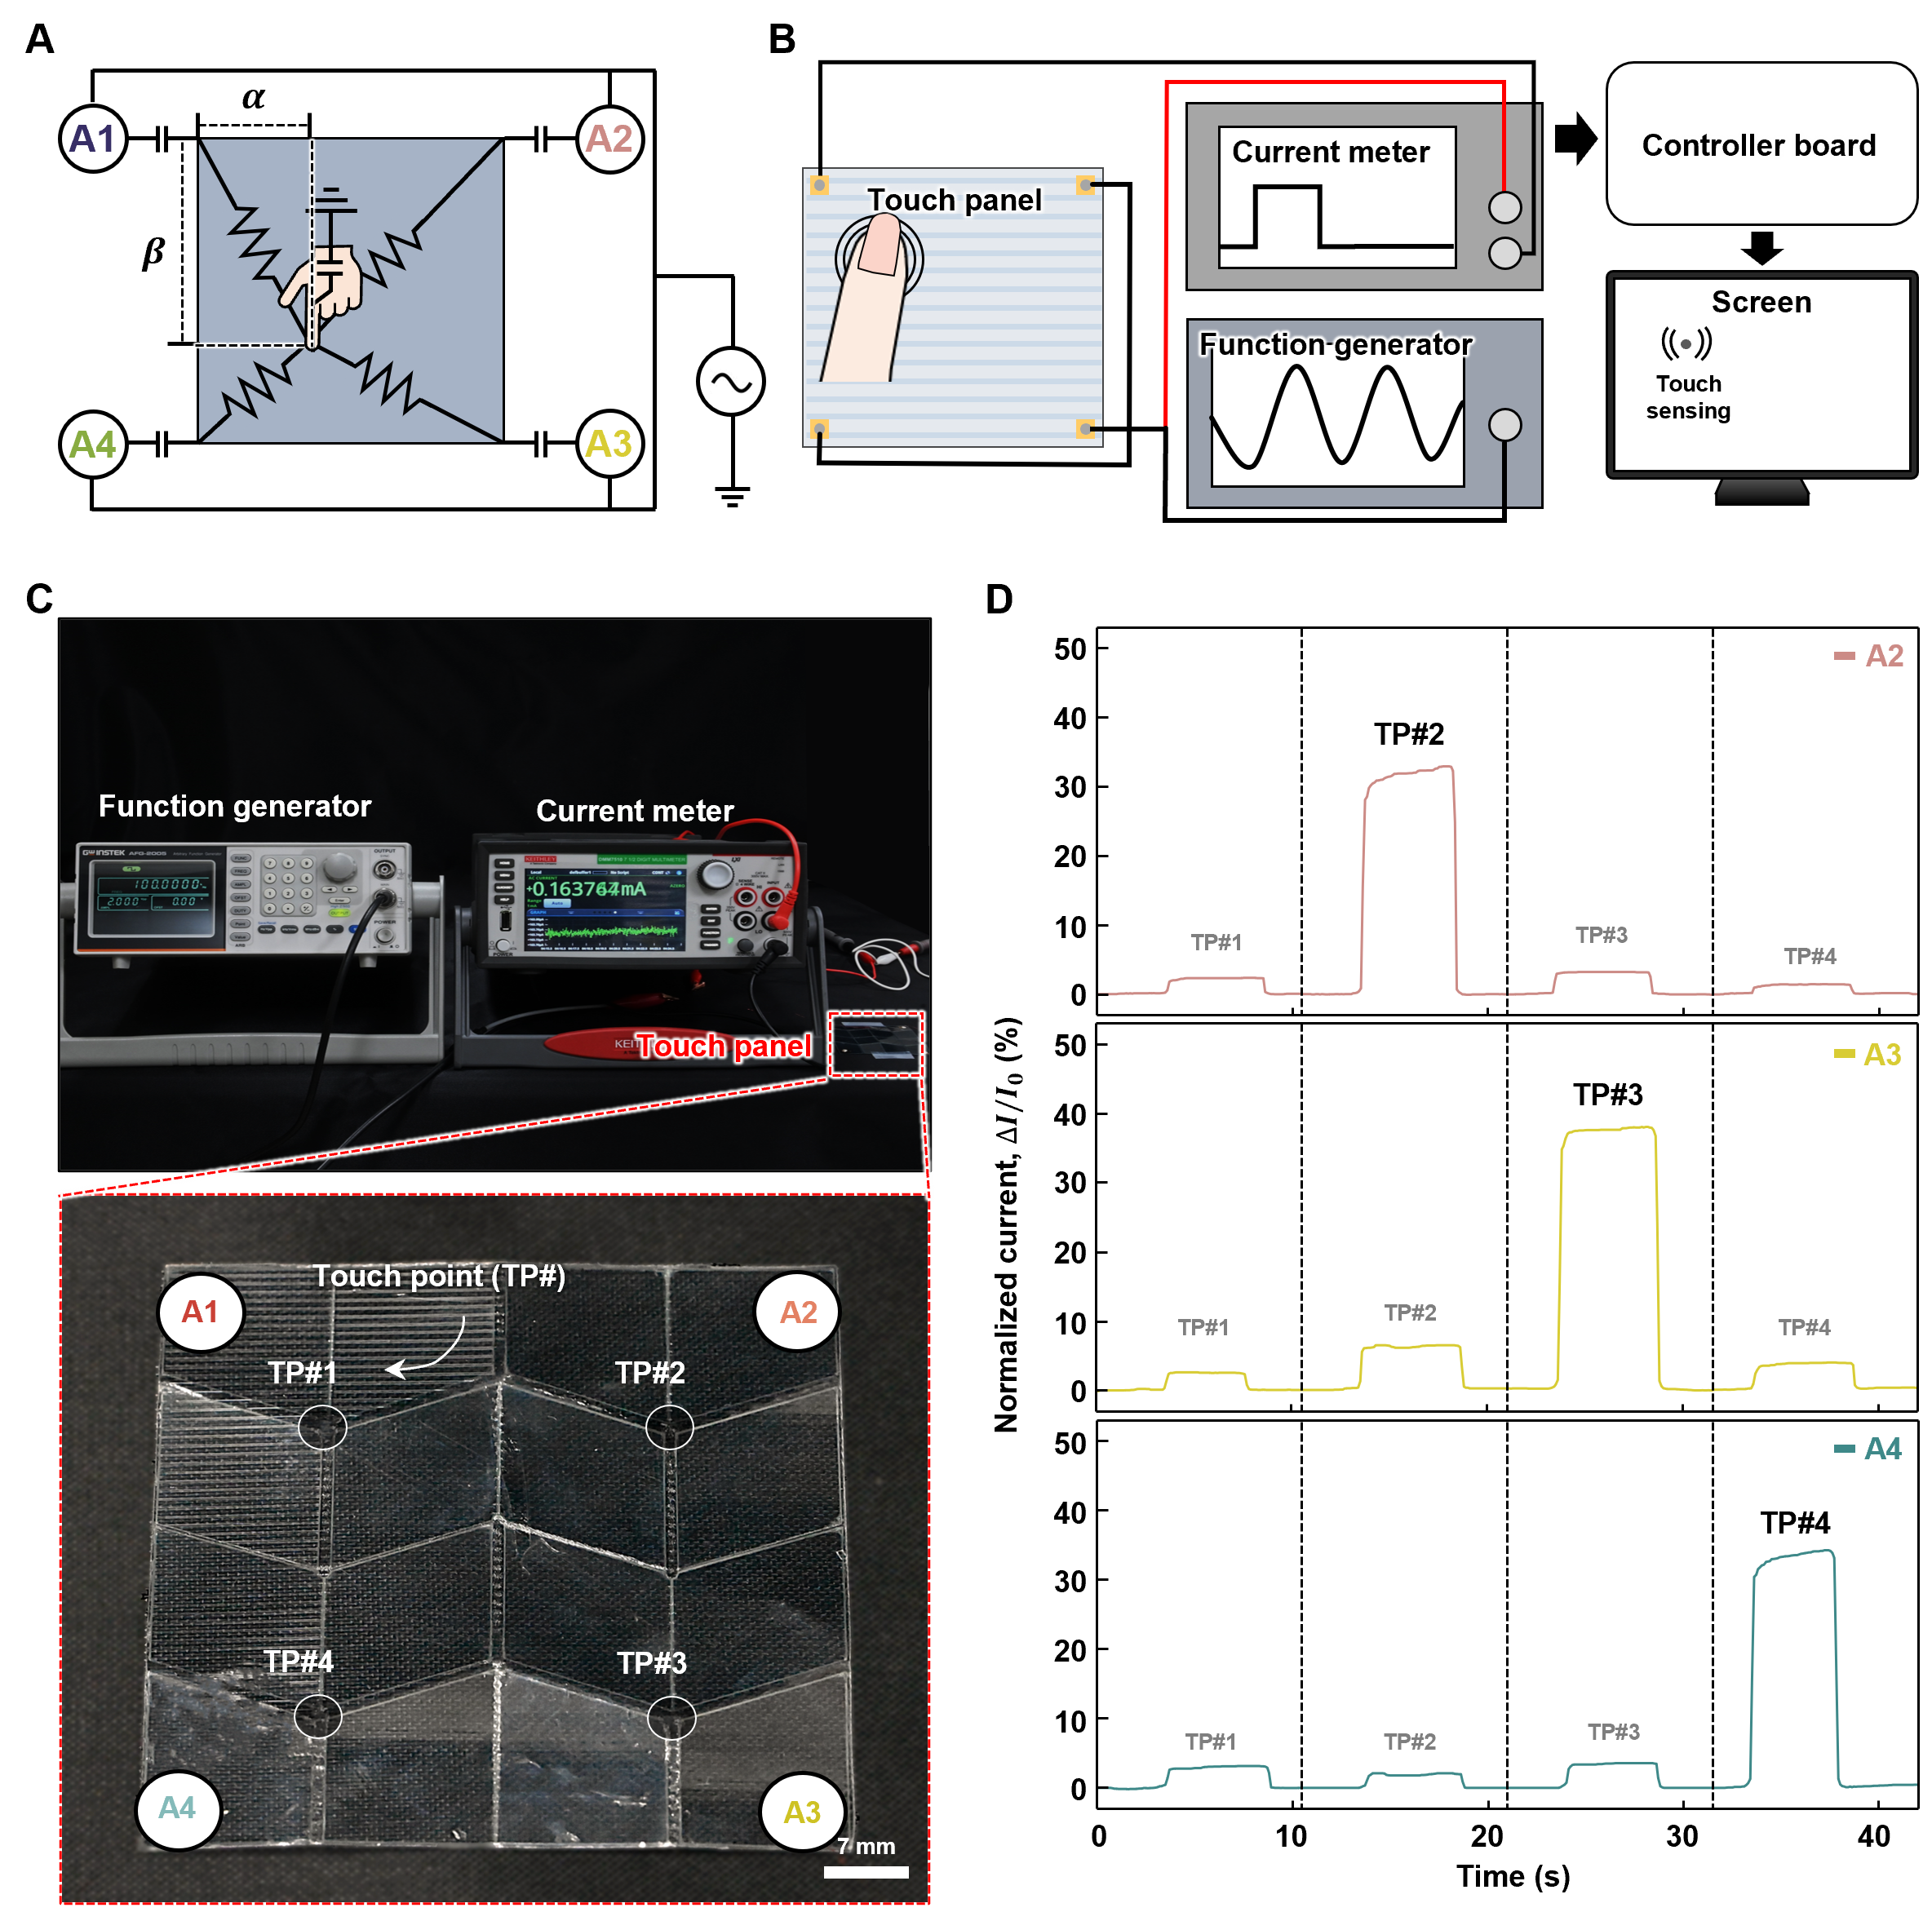


**Fig.** **S10. Construction of a Miura-patterned 2D touch panel for continuous drawing. (A)** Schematic of the sensing mechanism of a surface-capacitive touch panel. **(B)** Schematic of the setup for accurate touch point display on the monitor. **(C)** Photographs of the setup for touch point detection. **(D)** Normalized current at each corner (A2, A3, A4) for detected touch points (TP#1–TP#4).


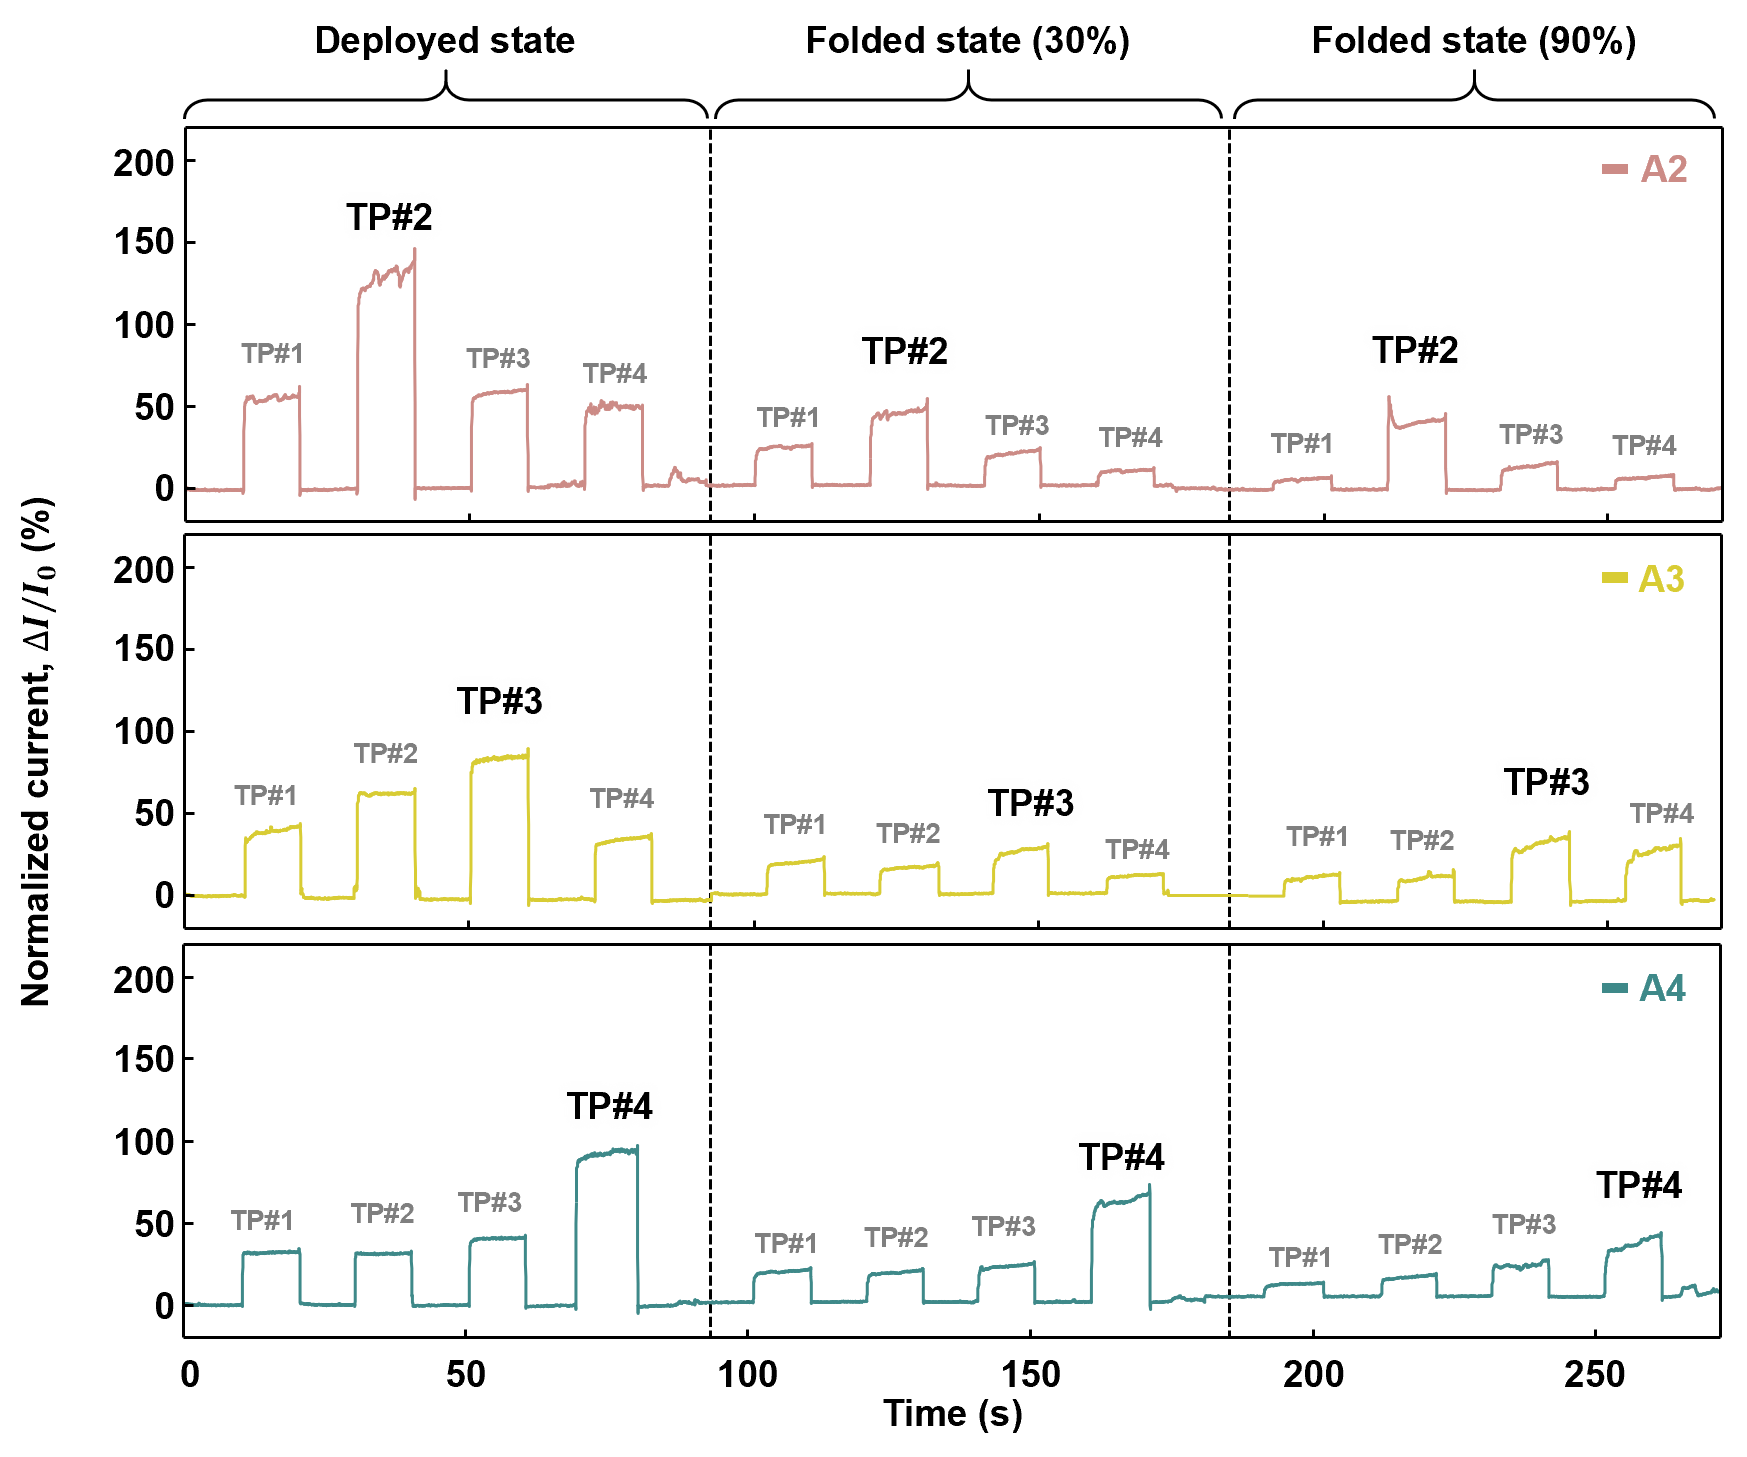


**Fig. S11.** **Normalized current changes of Miura-patterned origami electronics during folding.** Sensitive touch detection at each corner (A2, A3, and A4) closest to the touch point (TP#1–TP#4) in the deployed, 30% folded, and 90% folded states.


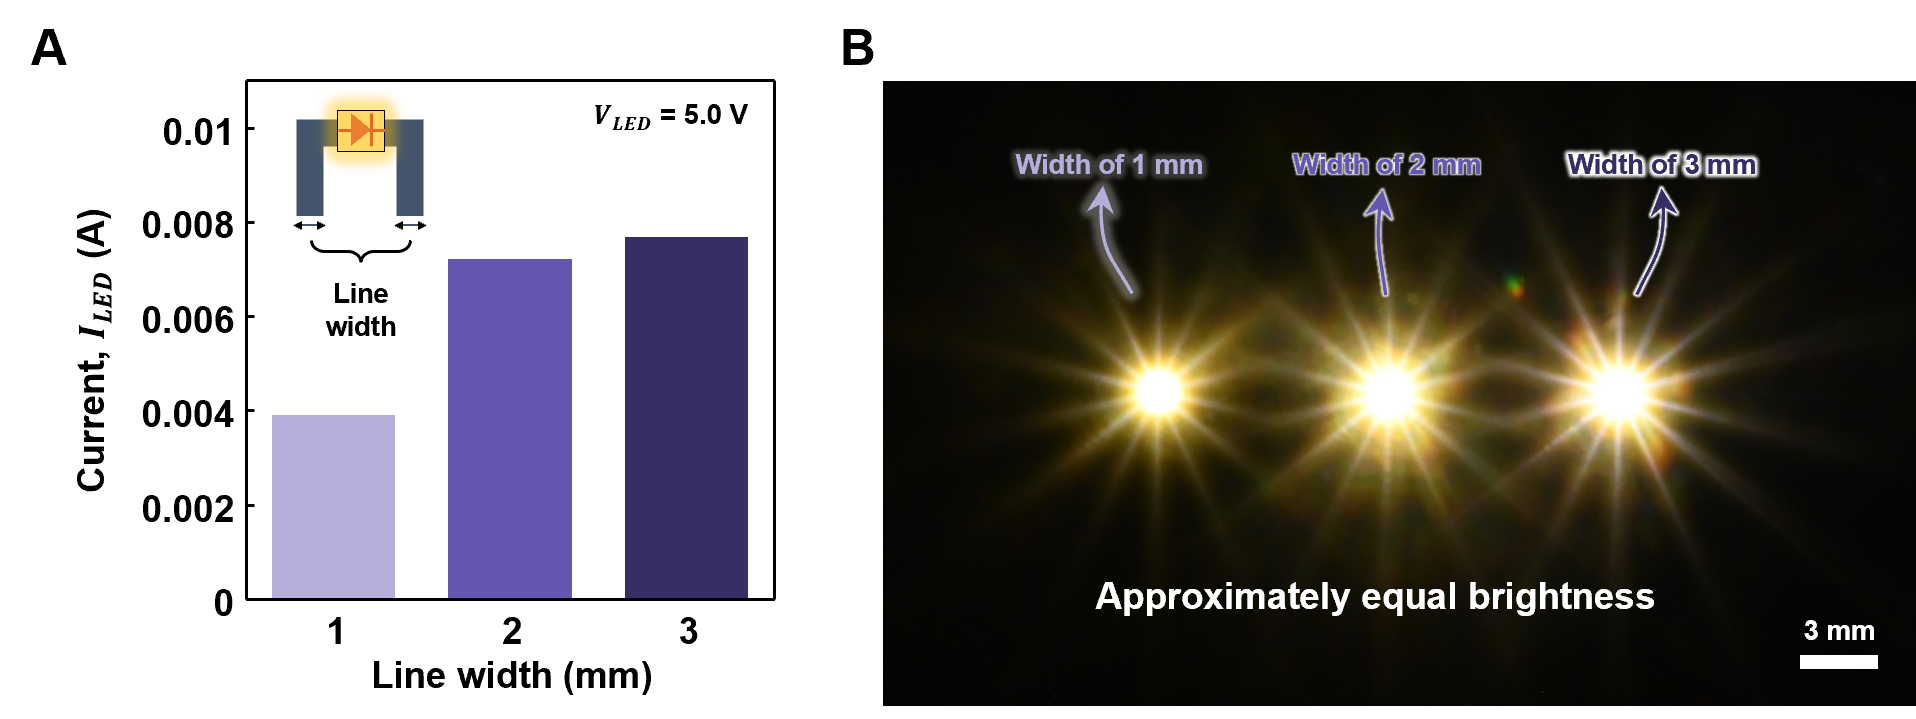


**Fig. S12.** **LED response according to the PEDOT:PSS line width. (A)** LED current according to the line width. **(B)** Real image of LED activation according to the line width.


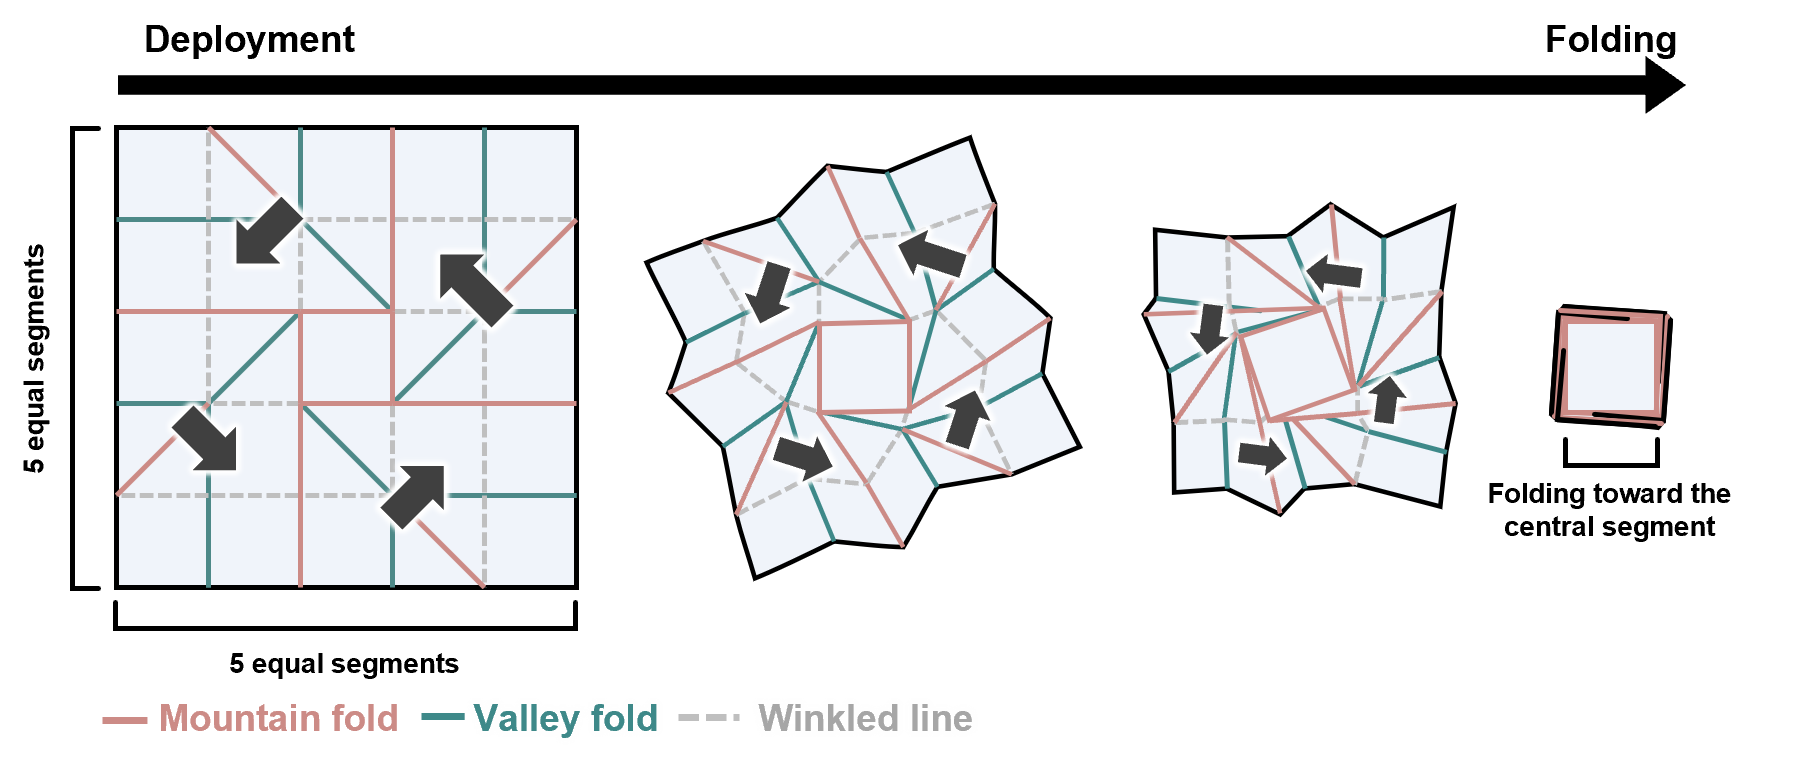


**Fig. S13.** **Schematic of the rotational folding process of the Flasher origami pattern.**


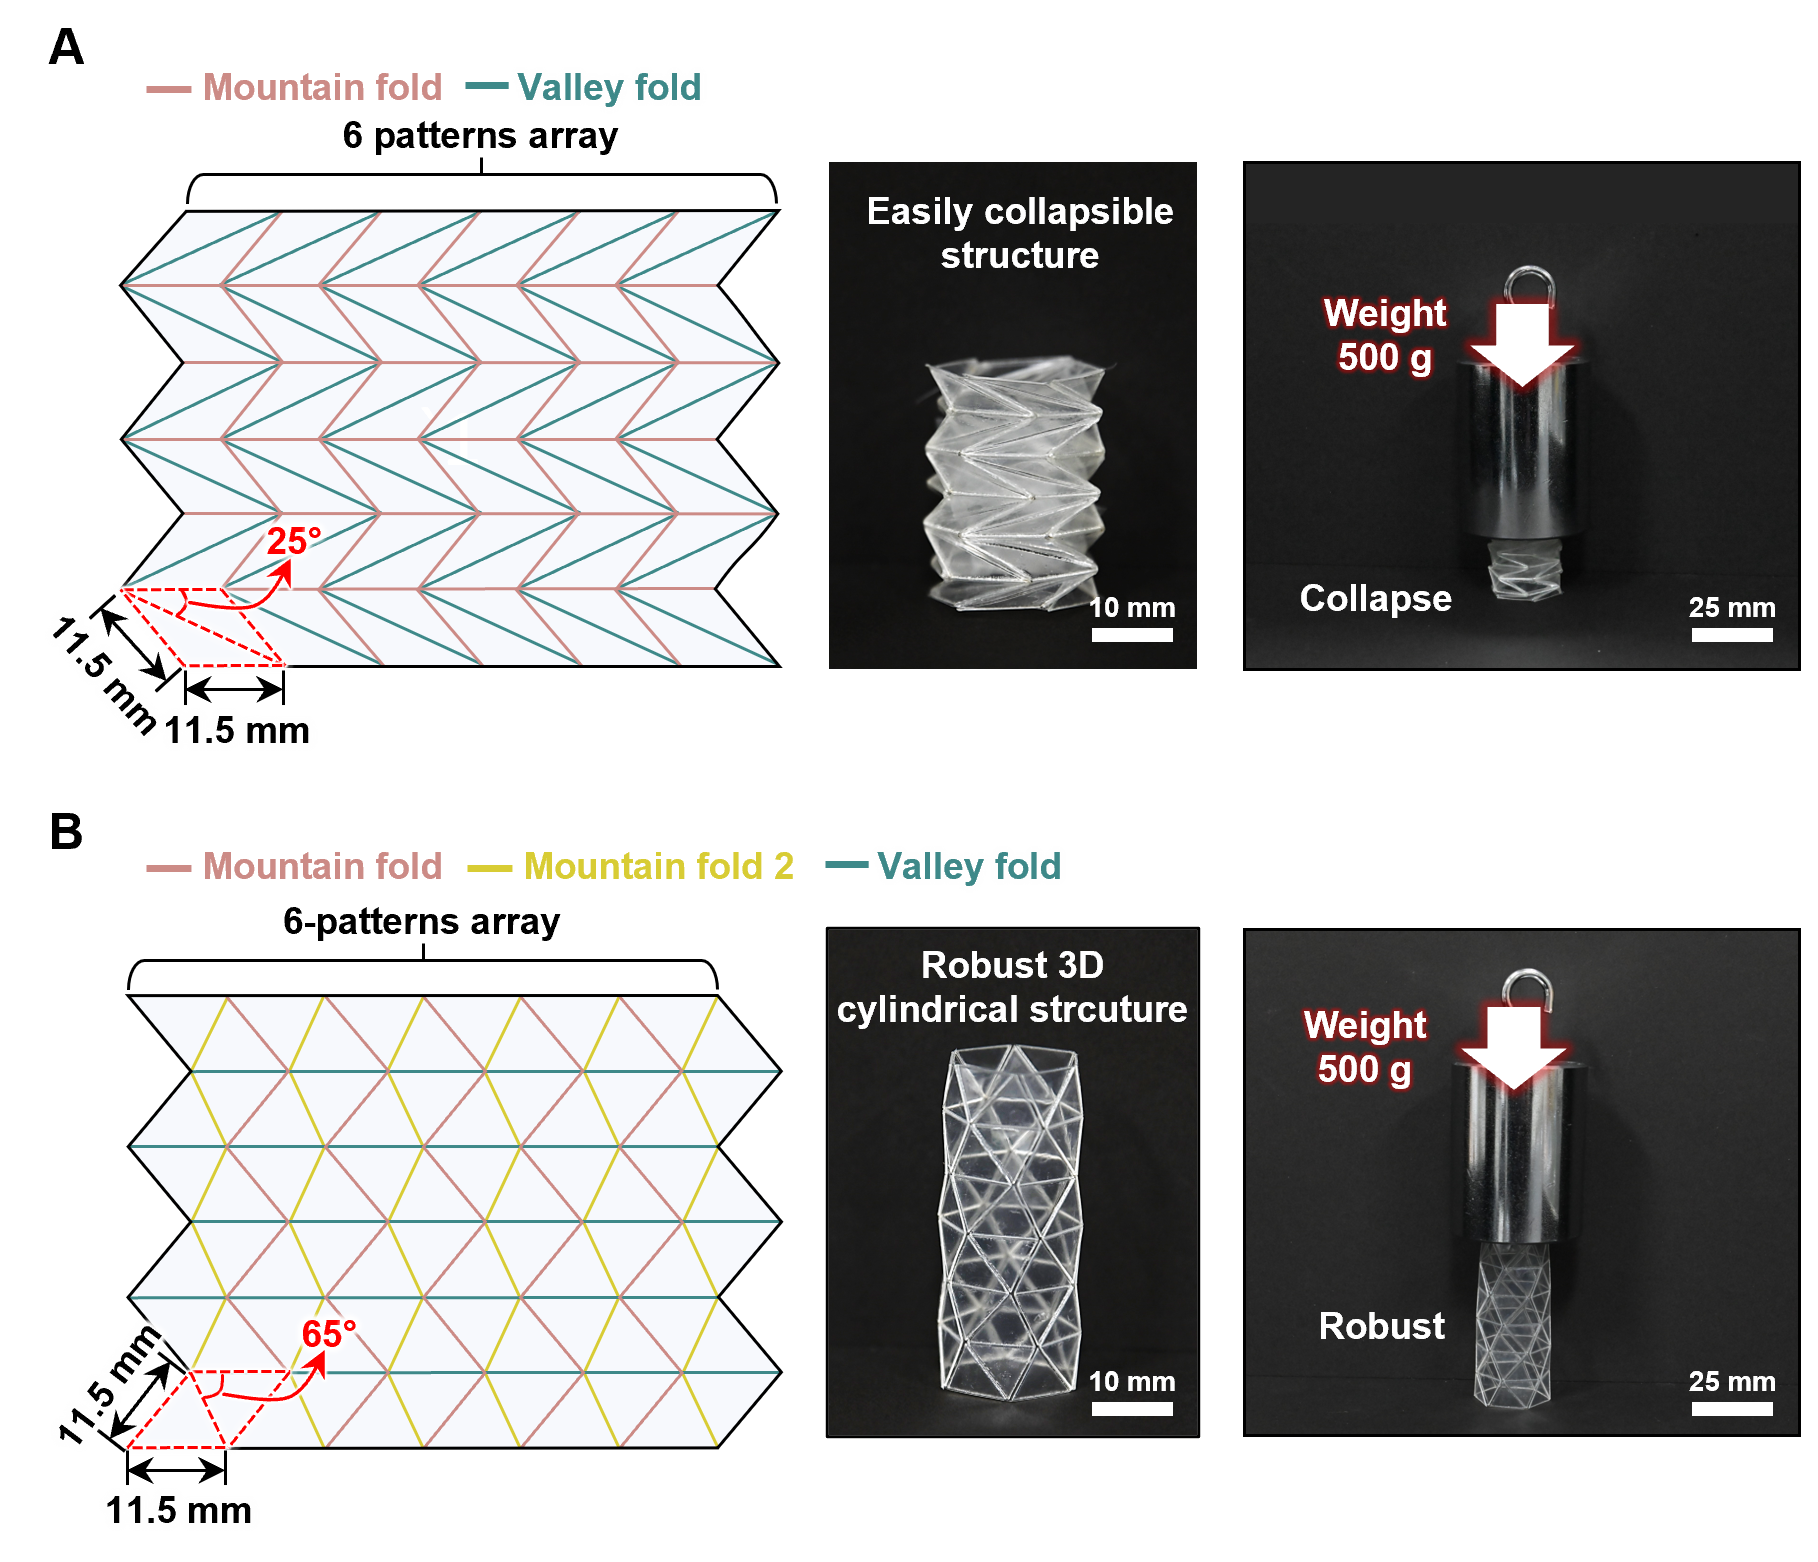


**Fig. S14.** **Design parameters and characteristics of the Kresling pattern. (A)** Design with a 25° angle, and its collapse characteristics. **(B)** Design with a 65° angle, and its robust characteristics.


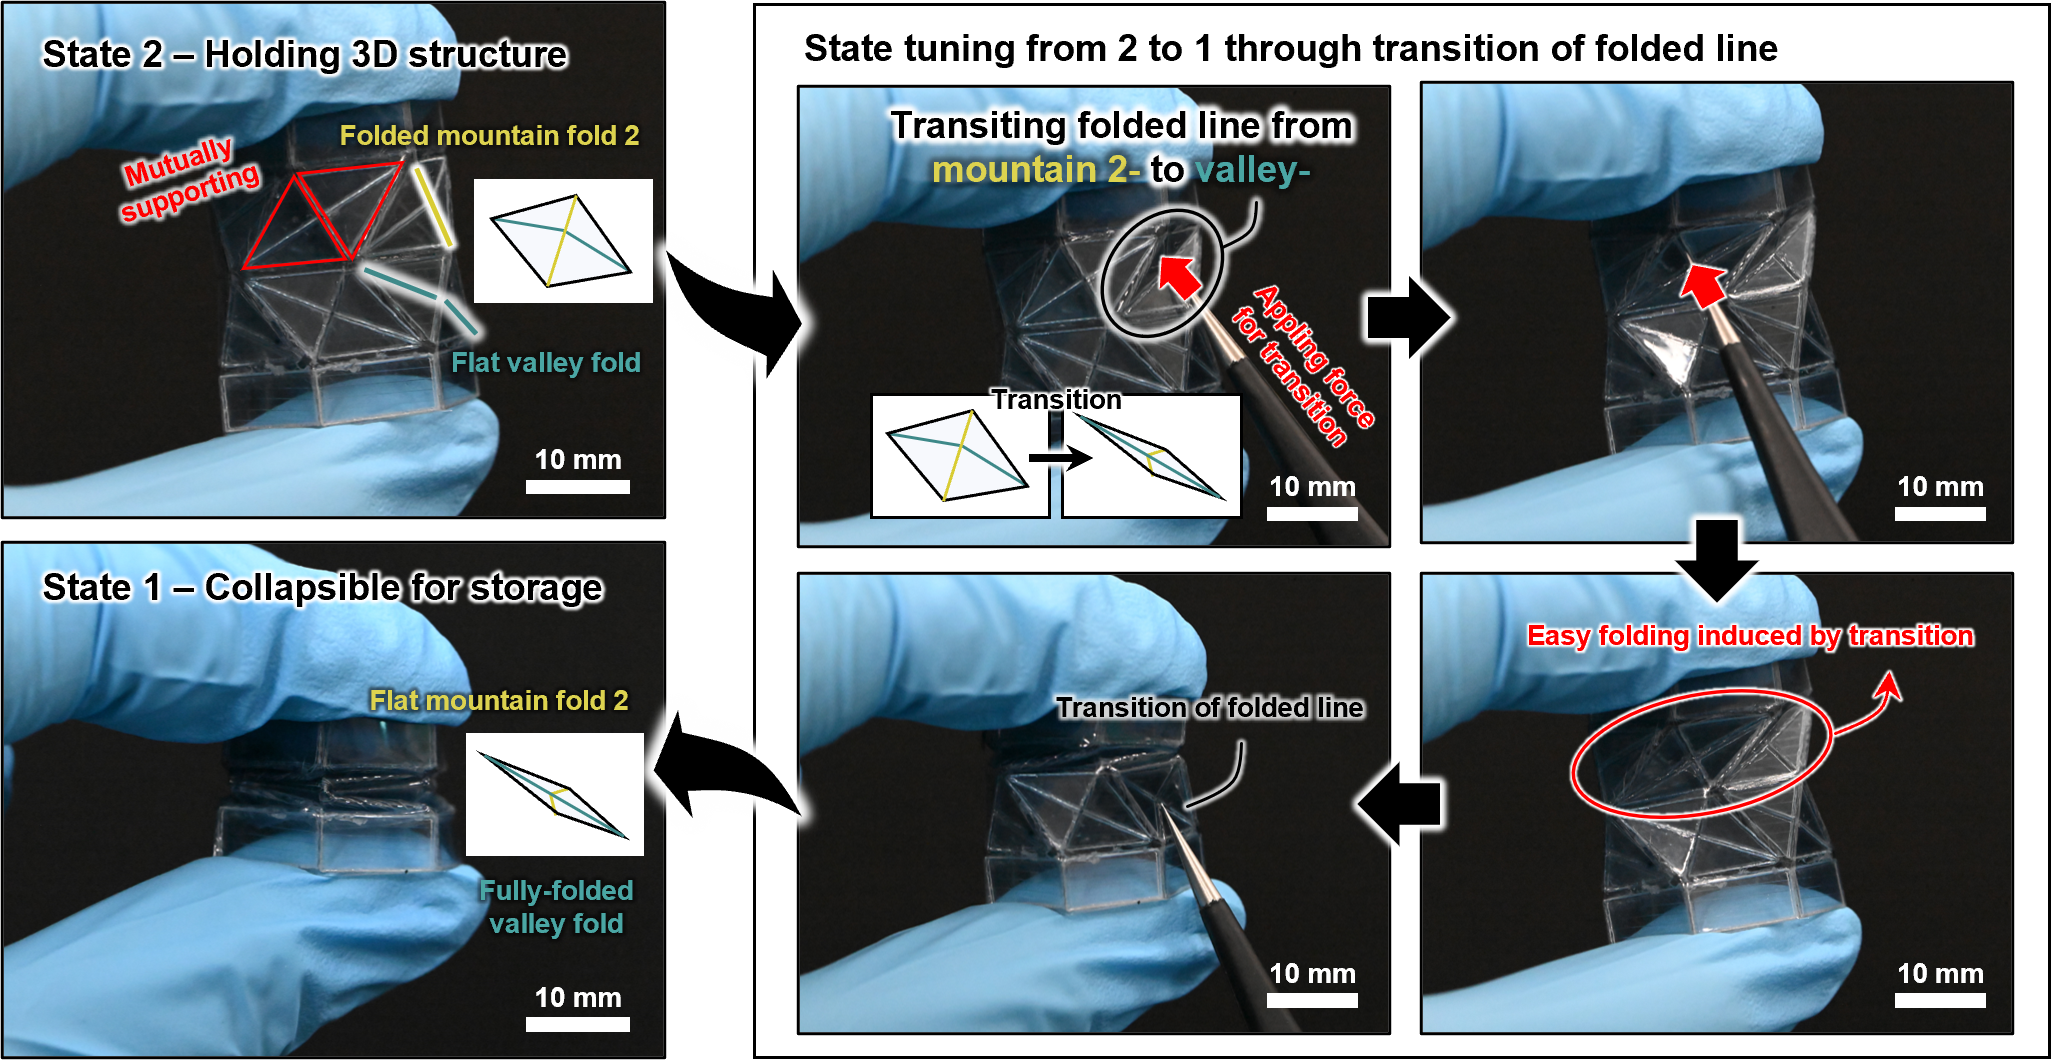


**Fig. S15.** **Tuning of the Kresling-patterned origami electronics from state 2 to state 1.**

**Supplementary Movies**

**Movie S1**. Electrical stability of fiber-reinforced origami electronics under folding

**Movie S2**. Electrical stability of fiber-reinforced origami electronics under pulling

**Movie S3**. Retention of electronic function under folding and pulling of the Flasher pattern

**Movie S4**. Electronic touch ring based on the Kresling pattern

**References**

1 Liu, H. *et al.* Low delay flexible paper-based electrode for capacitive sensor filled through carbon-based materials. *Cellulose* **30**, 1225-1244, doi:10.1007/s10570-022-04951-6 (2022).

2 Kim, S. *et al.* A highly sensitive capacitive touch sensor integrated on a thin-film-encapsulated active-matrix OLED for ultrathin displays. *IEEE Transactions on electron devices* **58**, 3609-3615 (2011).

3 Kim, C.-C., Lee, H.-H., Oh, K. H. & Sun, J.-Y. Highly stretchable, transparent ionic touch panel. *Science* **353**, 682-687 (2016).

4 Frey, M. H., Robrecht, M. J. & Jambor, G. F. (Google Patents, 2012).

5 Srinivasagam, K. & Vibheesh, B. Differentiating Noise from Real Touch—The Key to Robust Capacitive Sensing. *Cypress Semiconductor Corporation, dated Oct* (2010).

6 Roh, Y. *et al.* Crumple-recoverable electronics based on plastic to elastic deformation transitions. *Nature Electronics* **7**, 66-76, doi:10.1038/s41928-023-01089-6 (2023).

7 Greco, F. *et al.* Ultra-thin conductive free-standing PEDOT/PSS nanofilms. *Soft Matter* **7**, 10642, doi:10.1039/c1sm06174g (2011).

8 Lang, R. J., Magleby, S. & Howell, L. Single Degree-of-Freedom Rigidly Foldable Cut Origami Flashers. *Journal of Mechanisms and Robotics* **8**, doi:10.1115/1.4032102 (2016).

9 Yasuda, H., Tachi, T., Lee, M. & Yang, J. Origami-based tunable truss structures for non-volatile mechanical memory operation. *Nature communications* **8**, 962, doi:10.1038/s41467-017-00670-w (2017).

10 Zhai, Z., Wang, Y. & Jiang, H. Origami-inspired, on-demand deployable and collapsible mechanical metamaterials with tunable stiffness. *Proceedings of the National Academy of Sciences* **115**, 2032-2037 (2018).

11 Wang, X., Qu, H., Zhao, K., Yang, X. & Guo, S. Kresling origami derived structures and inspired mechanical metamaterial. *Smart Materials and Structures* **33**, 075030, doi:10.1088/1361-665X/ad5a5a (2024).
